# Supplementary material
Source: PubMed Central journal article supplement (PMC6203666)
Supplement: NIHMS961935-supplement-supplement_1.pdf [file NIHMS961935-supplement-supplement_1.pdf]

Supplemental Table S1: Loading Coefficients and Confirmatory Factor Analysis of Curiosity and Effortful Control factors

| Factor                             | Cronbach's Alpha | Questionnaire items included                                 | Loading coefficient for each item |
|------------------------------------|------------------|--------------------------------------------------------------|-----------------------------------|
| Curiosity<br>(5 variables)         | $\alpha = 0.73$  | Likes to try new things                                      | 0.66                              |
|                                    |                  | Shows eagerness to learn new things                          | 0.61                              |
|                                    |                  | Shows imagination in work and play                           | 0.61                              |
|                                    |                  | Easily adjusts to a new situation                            | 0.55                              |
|                                    |                  | Appropriately uses a variety of words to describe feelings   | 0.51                              |
| Effortful Control<br>(2 variables) | $\alpha = 0.67$  | Pays attention well                                          | 0.71                              |
|                                    |                  | Keeps working until finished with whatever he is asked to do | 0.71                              |
